# Supplementary material for: Stretchable and Conductive Cellulose/Conductive Polymer Composite Films for On-Skin Strain Sensors
Source: MDPI journal article supplement (doi:10.3390/ma15145009), 2022-07-19
Supplement: s1 [file s1]

## Supporting Information

# Stretchable and Conductive Cellulose/Conductive Polymer Composite Films for On-Skin Strain Sensors

Joo Won Han <sup>1</sup>, Jihyun Park <sup>2</sup>, Jung Ha Kim <sup>2</sup>, Siti Aisyah Nurmaulia Entifar <sup>2</sup>, Ajeng Prameswati <sup>2</sup>, Anky Fitrian Wibowo <sup>2</sup>, Soyeon Kim <sup>3</sup>, Dong Chan Lim <sup>3</sup>, Jonghee Lee <sup>4</sup>, Myoung-Woon Moon <sup>5</sup>, Min-Seok Kim <sup>5</sup> and Yong Hyun Kim <sup>2,6,\*</sup>

<sup>1</sup> Industry-University Cooperation Foundation, Pukyong National University, Busan 48513, Korea; hanjoo1020@naver.com

<sup>2</sup> Department of Smart Green Technology Engineering, Pukyong National University, Busan 48513, Korea; ds3dem@naver.com (J.P.); lagamuffin@naver.com (J.H.K.); nurmauliaentifar29@gmail.com (S.A.N.E.); ajengprameswati97@gmail.com (A.P.); ankiz118248@gmail.com (A.F.W.)

<sup>3</sup> Surface Technology Division, Korea Institute of Materials Science (KIMS), Changwon 51508, Korea; kimso1965@kims.re.kr (S.K.); dclim@kims.re.kr (D.C.L.)

<sup>4</sup> Department of Creative Convergence Engineering, Hanbat National University, Daejeon 34158, Korea; jonghee.lee@hanbat.ac.kr

<sup>5</sup> Department of Materials and Life Science Research Division, Korea Institute of Science and Technology, Seoul 02792, Korea; mwmoon@kist.re.kr (M.-W.M.); nanostructures@kist.re.kr (M.-S.K.)

<sup>6</sup> School of Electrical Engineering, Pukyong National University, Busan 48513, Korea

\* Correspondence: yhkim113@pknu.ac.kr

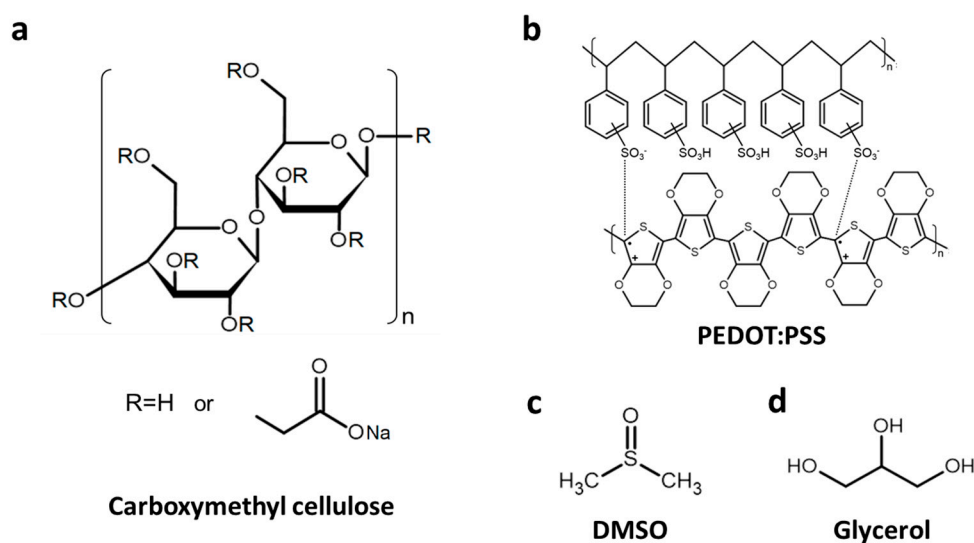

**Figure S1.** Chemical structures of (a) carboxymethyl cellulose (CMC), (b) PEDOT:PSS, (c) DMSO, and (d) glycerol.

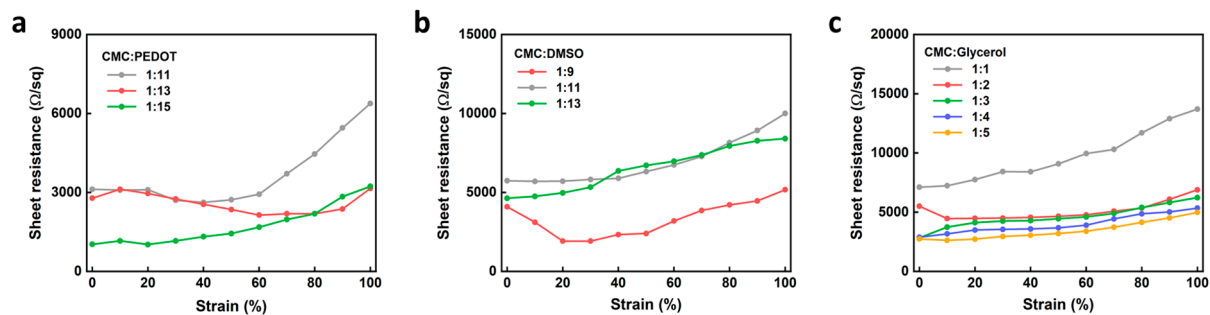

**Figure S2.** Sheet resistances of CMC-PEDOT:PSS films as a function of ratios of CMC to (a) PEDOT:PSS, (b) DMSO, and (c) glycerol.

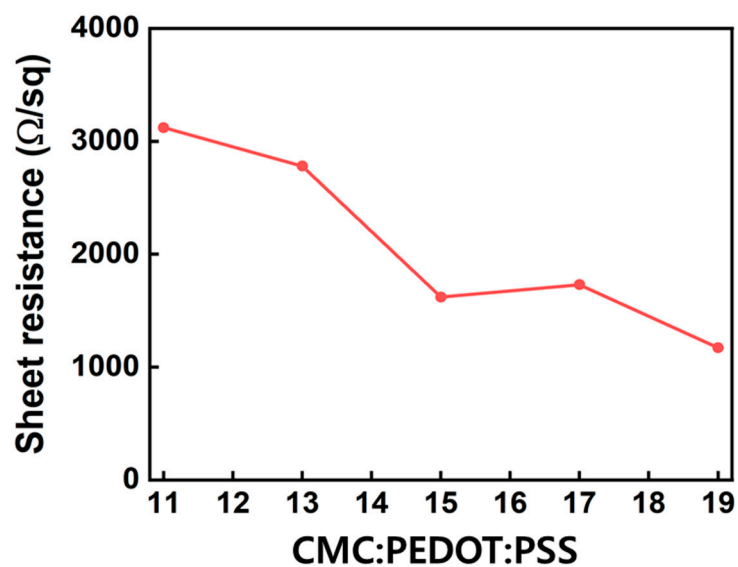

**Figure S3.** Sheet resistance of the CMC-PEDOT:PSS film (CMC:DMSO=1:11 and CMC:glycerol=1:5) as a function of the ratio of CMC to PEDOT:PSS.

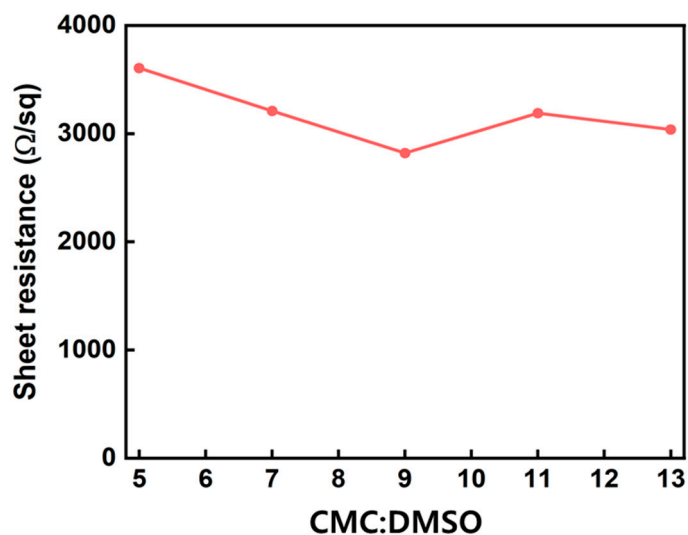

**Figure S4.** Sheet resistance of CMC-PEDOT:PSS film (CMC:PEDOT:PSS=1:13 and CMC:glycerol=1:2) as a function of the ratio of CMC to DMSO.

**Table S1.** Cellulose-PEDOT-based composites and their electrical conductivities.

| Samples                                                              | Flexible or Stretchable | Electrical conductivity (S/cm)  | Ref.      |
|----------------------------------------------------------------------|-------------------------|---------------------------------|-----------|
| Bacterial cellulose (BC) fiber/AuNPs/PEDOT:PSS                       | Flexible                | $16.65 \pm 1.274$               | [1]       |
| Cellulose nanofibers(CNFs)/PEDOT:PSS/PPy (CNF/PEDOT:PSS)             | Flexible                | 10.55 (2.58)                    | [2]       |
| $\alpha$ -Cellulose/PEDOT:PSS/MWCNT ( $\alpha$ -Cellulose/PEDOT:PSS) | Flexible                | 300 (30)                        | [3]       |
| cellulose nanofiber (CNFs)/PEDOT:PSS                                 | Flexible                | 22.6                            | [4]       |
| PEDOT:PSS/CNF nanopaper                                              | Flexible                | 66.67                           | [5]       |
| Polythiophene-Derivative Cellulose                                   | Flexible                | 0.5-0.8                         | [6]       |
| PEDOT/sulfated cellulose (CS)                                        | Flexible                | $5.76 \times 10^{-3}$           | [7]       |
| PVA/Gly-CNC/PVP/PEDOT                                                | Stretchable             | $1.73 \times 10^{-2} \pm 0.099$ | [8]       |
| Carboxymethyl cellulose/Lab-synthesized PEDOT:PSS                    | Stretchable             | $9.7 \times 10^{-3}$            | This work |

## References

- Khan, S.; Ul-Islam, M.; Ullah, M.W.; Israr, M.; Jang, J.H.; Park, J.K. Nano-Gold Assisted Highly Conducting and Biocompatible Bacterial Cellulose-PEDOT:PSS Films for Biology-Device Interface Applications. *Int. J. Biol. Macromol.* **2018**, *107*, 865–873, doi:10.1016/j.ijbiomac.2017.09.064.
- Lay, M.; Pèlach, M.À.; Pellicer, N.; Tarrés, J.A.; Bun, K.N.; Vilaseca, F. Smart Nanopaper Based on Cellulose Nanofibers with Hybrid PEDOT:PSS/Polypyrrole for Energy Storage Devices. *Carbohydr. Polym.* **2017**, *165*, 86–95, doi:10.1016/j.carbpol.2017.02.043.
- Zhao, D.; Zhang, Q.; Chen, W.; Yi, X.; Liu, S.; Wang, Q.; Liu, Y.; Li, J.; Li, X.; Yu, H. Highly Flexible and Conductive Cellulose-Mediated PEDOT:PSS/MWCNT Composite Films for Supercapacitor Electrodes. *ACS Appl. Mater. Interfaces* **2017**, *9*, 13213–13222, doi:10.1021/acsami.7b01852.
- Ko, Y.; Kim, D.; Kim, U.J.; You, J. Vacuum-Assisted Bilayer PEDOT:PSS/Cellulose Nanofiber Composite Film for Self-Standing, Flexible, Conductive Electrodes. *Carbohydr. Polym.* **2017**, *173*, 383–391, doi:10.1016/j.carbpol.2017.05.096.
- Du, H.; Zhang, M.; Liu, K.; Parit, M.; Jiang, Z.; Zhang, X.; Li, B.; Si, C. Conductive PEDOT:PSS/Cellulose Nanofibril Paper Electrodes for Flexible Supercapacitors with Superior Areal Capacitance and Cycling Stability. *Chem. Eng. J.* **2022**, *428*, 131994, doi:10.1016/j.cej.2021.131994.
- González, F.; Tiemblo, P.; Hoyos, M. In-Situ Approaches for the Preparation of Polythiophene-Derivative Cellulose Composites with High Flexibility and Conductivity. *Appl. Sci.* **2019**, *9*, doi:10.3390/app9163371.
- Horikawa, M.; Fujiki, T.; Shirosaki, T.; Ryu, N.; Sakurai, H.; Nagaoka, S.; Ihara, H. The Development of a Highly Conductive PEDOT System by Doping with Partially Crystalline Sulfated Cellulose and Its Electric Conductivity. *J. Mater. Chem. C* **2015**, *3*, 8881–8887, doi:10.1039/c5tc02074c.
- Lee, Y.; Choi, H.; Zhang, H.; Wu, Y.; Lee, D.; Wong, W.S.; Tang, X.S.; Park, J.; Yu, H.; Tam, K.C. Sensitive, Stretchable, and Sustainable Conductive Cellulose Nanocrystal Composite for Human Motion Detection. *ACS Sustain. Chem. Eng.* **2021**, *9*, 17351–17361, doi:10.1021/acssuschemeng.1c06741.
